# Supplementary material for: Responses of perivascular macrophages to circulating lipopolysaccharides in the subfornical organ with special reference to endotoxin tolerance
Source: Springer Nature journal article supplement (doi:10.1186/s12974-019-1431-6), 2019-02-14
Supplement: MOESM1 [file 16481392]

Journal of Neuroinflammation

Additional file 1

**Responses of perivascular macrophages to circulating lipopolysaccharides in the subfornical organ with special reference to endotoxin tolerance**

Shoko Morita-Takemura · Kazuki Nakahara · Sanae Hasegawa-Ishii · Ayami Isonishi · Kouko Tatsumi · Hiroaki Okuda · Tatsuhide Tanaka · Masahiro Kitabatake · Toshihiro Ito · Akio Wanaka

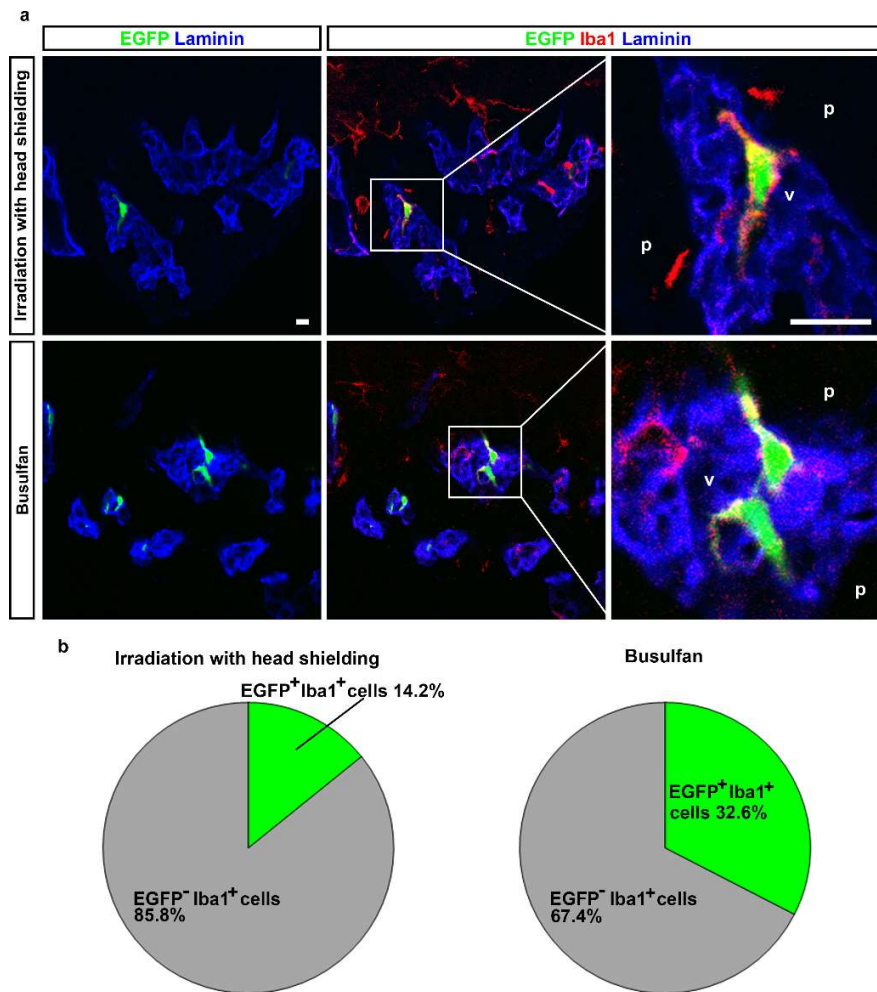

**Supplementary Fig. 1.** Engraftment of bone marrow-derived cells into the SFO. Cryosections were immunostained with antibodies against the myeloid lineage cell marker Iba1 and the outer basement membrane marker laminin-111. (a) Immunohistochemistry shows EGFP<sup>+</sup> Iba1<sup>+</sup> cells in the SFO of irradiated chimeric mice with head shield 4 weeks after reconstitution (upper) and that of busulfan-treated chimeric mice 4 weeks after reconstitution (lower). (b) Quantification of results from a. Data were obtained from 4-5 animals (37-46 sections) and 289-470 Iba1<sup>+</sup> perivascular macrophages were examined. *Laminin* laminin-111, *p* parenchymal area, *v* vasculature. Scale bars are 10  $\mu$ m.

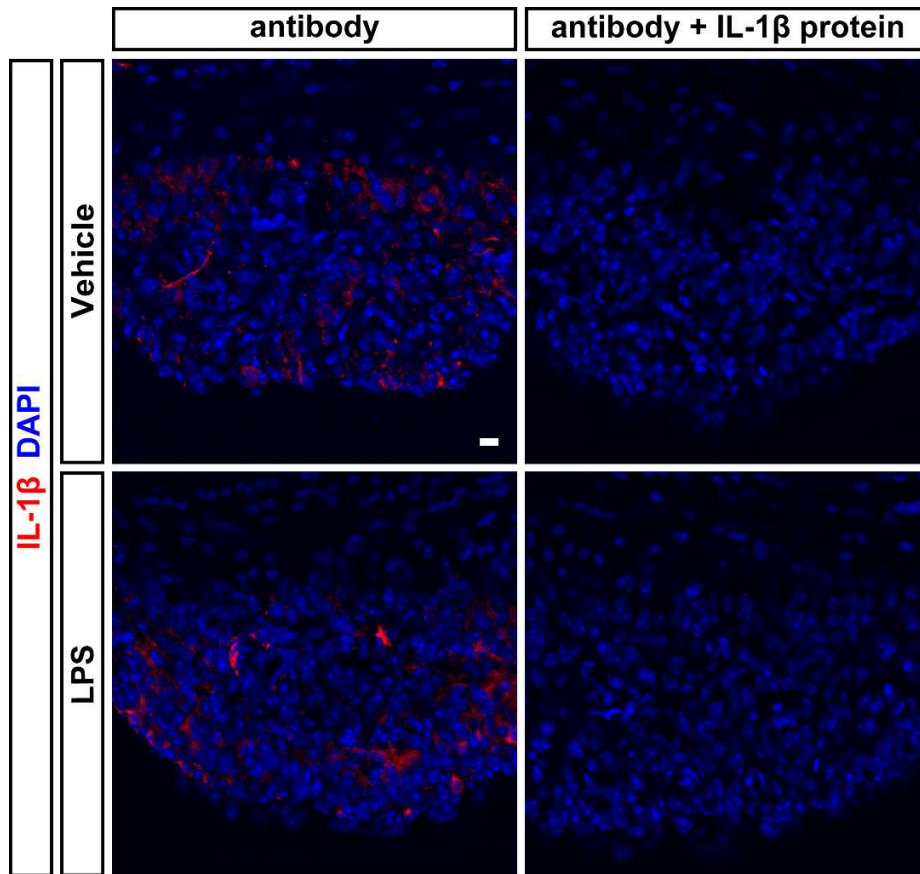

**Supplementary Fig. 2.** Specificity controls for IL-1 $\beta$  antibody. (upper) Immunohistochemistry was performed on mouse brain sections with anti-IL-1 $\beta$  antibody. (b) Anti-IL-1 $\beta$  antibody was pre-adsorbed with IL-1 $\beta$  recombinant protein and used for immunohistochemistry preadsorption control. The IL-1 $\beta$  staining was significantly diminished or abolished when the diluted primary antibody was preincubated with the IL-1 $\beta$  recombinant protein. (lower) The IL-1 $\beta$  staining was also abolished by antibody pre-incubation with the IL-1 $\beta$  recombinant protein in the SFO of LPS-injected mice. Nuclei were counterstained with 4,6-diamidino-2-phenylindole. Scale bar is 10  $\mu$ m.



immunoreactive for Iba1. (c) The SFO perivascular Iba1<sup>+</sup> cells were able to phagocytose circulating dextran. (d) Quantification of results from c. Data were obtained from 5 animals (48 sections) and 383 Dextran 70,000<sup>+</sup> spots were examined. (e) The SFO perivascular Iba1<sup>+</sup> cells were negative for the pericyte marker desmin. *Dex70k* Dextran 70,000, *Laminin* laminin-111, *p* parenchymal area, *PVS* perivascular space, *v* vasculature. Scale bars are 10 μm.

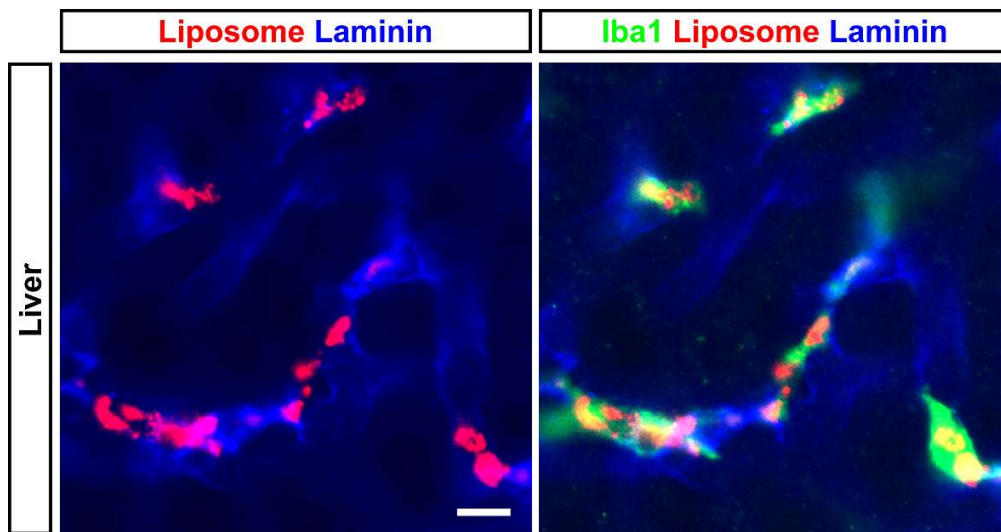

**Supplementary Fig. 4.** Localization of peripherally injected control liposomes in the SFO. Cryosections were immunostained with antibodies against the myeloid lineage cell marker Iba1 and the outer basement membrane marker laminin-111. Dil-labeled control liposomes were found in the liver and co-localized with Iba1 immunoreactivity. *Laminin* laminin-111. Scale bar is 10  $\mu\text{m}$ .
